# Supplementary material for: Characterization of Phosphate Compounds along a Catena from Arable and Wetland Soil to Sediments in a Baltic Sea lagoon
Source: MDPI journal article supplement (doi:10.3390/soilsystems7010015), 2023-02-07
Supplement: s1 [file s1]

## Supplementary Material

*Characterization of phosphate compounds along a catena from arable and wetland soil to sediments in a Baltic Sea lagoon*

Journal: Soil Systems

Authors: Prüter J, Schumann R, Klysubun W, Leinweber P

Corresponding Author: Peter Leinweber  
Soil Science, Faculty of Agricultural and Environmental Science,  
University of Rostock  
peter.leinweber@uni-rostock.de

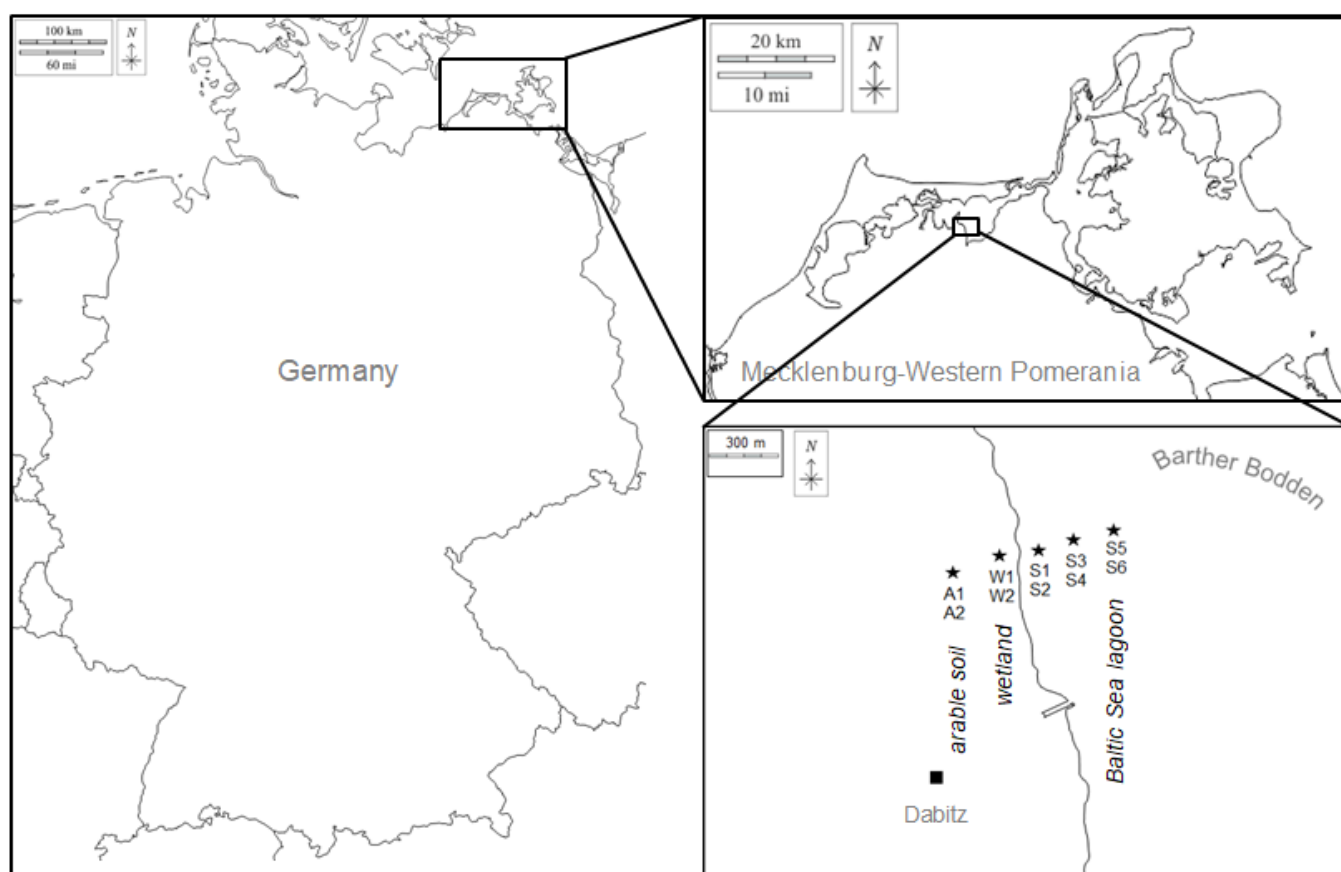

★ sampling spots

**Figure S1** Map of the location of investigated arable (A) and wetland (W) soils and sediments (S).

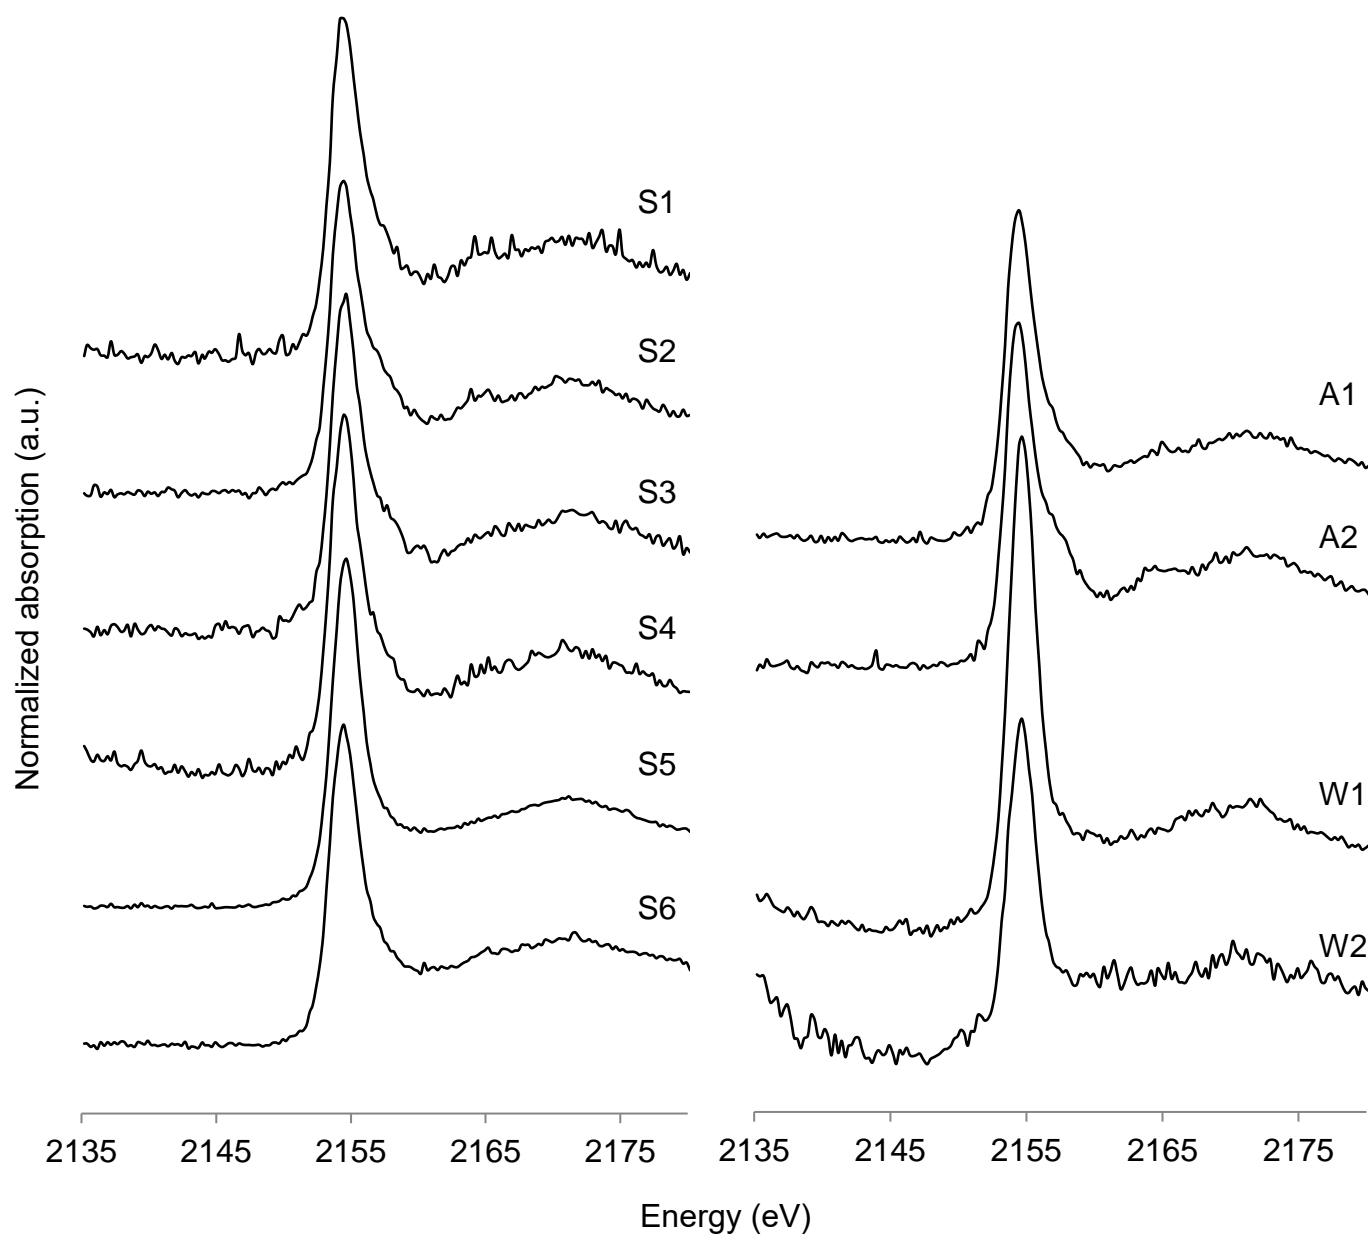

**Figure S2** P K-edge XANES spectra of soil (A, W) and sediment (S) samples.

**Table S1** *R* factors of the results of linear combination fitting from P *K*-edge XANES analyses of soil (A, W) and sediment (S) samples. If fits were averaged, the best *R* factor is given.

| <b>Sample</b> | <b><i>R</i> factor</b> |
|---------------|------------------------|
| A1            | 0.0033                 |
| A2            | 0.0033                 |
| W1            | 0.0073                 |
| W2            | 0.0161                 |
| S1            | 0.0095                 |
| S2            | 0.0059                 |
| S3            | 0.0090                 |
| S4            | 0.0070                 |
| S5            | 0.0022                 |
| S6            | 0.0066                 |
