# Supplementary material for: Characterization of Phosphate Compounds along a Catena from Arable and Wetland Soil to Sediments in a Baltic Sea lagoon
Source: MDPI journal article supplement (doi:10.3390/soilsystems7010015), 2023-02-07
Supplement: s1 [file s1]

Archive with 1 entries (1 files):
- soilsystems-2184479-supplementary.pdf
